1 **Pivotal involvement of the CX3CL1-CX3CR1 axis for the**  
2 **recruitment of M2-TAMs in skin carcinogenesis**

3

4 Yuko Ishida<sup>1</sup>, Yumi Kuninaka<sup>1</sup>, Yuki Yamamoto<sup>2</sup>, Mizuho Nosaka<sup>1</sup>, Akihiko Kimura<sup>1</sup>,  
5 Fukumi Furukawa<sup>2</sup>, Naofumi Mukaida<sup>3</sup> and Toshikazu Kondo<sup>1\*</sup>

6

7 <sup>1</sup>Department of Forensic Medicine, Wakayama Medical University, Wakayama, Japan

8 <sup>2</sup>Department of Dermatology, Wakayama Medical University, Wakayama, Japan

9 <sup>3</sup>Division of Molecular Bioregulation, Cancer Research Institute, Kanazawa University,  
10 Kanazawa, Japan

11

12 **\*Corresponding to:** Toshikazu Kondo MD & PhD, Department of Forensic Medicine,  
13 Wakayama Medical University, 811-1 Kimiidera, Wakayama, 641-8509 Japan

14 Phone & Fax: +81-73-441-0641

15 E-mail: kondot@wakayama-med.ac.jp

16

17 **Running title :** CX3CL1-CX3CR1 in skin carcinogenesis

18 **Keywords :** CX3CL1/CX3CR1/M2-macrophages/skin carcinogenesis/tumor-associated  
19 macrophages

20

21 The authors declare no potential conflicts of interest.

22

23 4,815 words, 6 figures, 3 supplemental figures, 2 supplemental tables

24 **ABSTRACT**

25 We previously revealed the crucial roles of CX3CL1-CX3CR1 axis in skin wound  
26 healing. Although repeated wounds frequently develop into skin cancer, the roles of  
27 CX3CL1 in skin carcinogenesis remain elusive. Here, we proved that CX3CL1 protein  
28 expression and CX3CR1<sup>+</sup> macrophages were observed in human skin cancer tissues.  
29 Similarly, we observed the enhancement of CX3CL1 expression and the abundant  
30 accumulation of CX3CR1<sup>+</sup> tumor-associated macrophages (TAMs) with M2 phenotypes  
31 in the skin carcinogenesis process induced by the combined treatment with  
32 7,12-dimethylbenz-(a)anthracene (DMBA) and 12-*O*-tetradecanoylphorbol-13-acetate  
33 (TPA). In this mouse skin carcinogenesis process, CX3CR1<sup>+</sup> TAMs exhibited M2  
34 phenotypes with the expression of Wnt3a and angiogenic molecules including vascular  
35 endothelial growth factor (VEGF) and matrix metalloproteinase (MMP)-9. Compared to  
36 wild-type mice, CX3CR1-deficient mice showed fewer numbers of skin tumors with a  
37 lower incidence. Concomitantly, M2-macrophage numbers and neovascularization  
38 reduced with the depressed expression of angiogenic factors and Wnt3a. Thus, the  
39 CX3CL1-CX3CR1 axis can crucially contribute to skin carcinogenesis by regulating the  
40 accumulation and functions of TAMs. Thus, this axis can be a good target for preventing  
41 and/or treating skin cancers.

42

43

44 **INTRODUCTION**

45 Inflammation is a classical and biological response to either internal or external stimuli  
46 to prevent tissue damages. However, prolonged inflammation destroys the tissue  
47 parenchyma, occasionally resulting in the induction of tumorigenesis, which can be  
48 furthered by infiltrating leukocytes, which are essential cell components of  
49 inflammation (Mantovani *et al*, 2008; Coussens & Werb, 2002).

50 Chemokines are a family of cytokines, comprising more than 40 molecules:  
51 they are produced by various types of cells in response to inflammatory cytokines,  
52 growth factors, and pathogenic stimuli (Rossi & Zlotnik, 2000). Chemokines can induce  
53 the migration of distinct types of leukocytes and non-leukocytic cells, which express  
54 their cognate receptors. As a result, they can crucially contribute to inflammation by  
55 inducing the migration of distinct sets of leukocytes into inflammatory sites. Moreover,  
56 accumulating evidence may indicate that several chemokines produced by cancer cells  
57 can regulate leukocyte trafficking into the tumor microenvironment (Balkwill, 2012;  
58 Balkwill, 2004; Allavena *et al*, 2011). Recruited leukocytes can induce angiogenesis and  
59 the generation of the fibroblast stroma, which are essential components of cancer tissues  
60 (Allavena *et al*, 2011; Mantovani *et al*, 2010), and can eventually promote  
61 carcinogenesis. Furthermore, some chemokines can have direct effects on cancer cells,  
62 enhancing their growth and motility, thereby accelerating cancer progression (Balkwill,  
63 2004).

64 CX3C chemokine ligand-1 (CX3CL1) is a membrane-bound chemokine, in  
65 contrast to most other chemokines, which are secreted molecules. CX3CL1 can  
66 specifically and exclusively bind its receptor, CX3C chemokine receptor-1 (CX3CR1),  
67 which is expressed mainly by macrophages, Th1 cells, NK cells, immature dendritic  
68 cells, and endothelial cells (Sugaya, 2015). Thus, the CX3CL1-CX3CR1 axis can be

69 used to augment tumor immunity by recruiting Th1 and NK cells (Sugaya, 2015). In  
70 contrast to its potential anti-tumor activity, accumulating evidence may indicate the  
71 pro-tumorigenic activity of the CX3CL1-CX3CR1 axis, which was overexpressed in  
72 various types of cancers including breast, prostate, pancreas, ovary, kidney, and colon  
73 cancers (Tsang *et al*, 2013; Shulby *et al*, 2004; Celesti *et al*, 2013; Kim *et al*, 2012; Yao  
74 *et al*, 2014; Zheng *et al*, 2013). Similarly, the roles of CX3CL1 in tumor invasion and  
75 metastasis are still controversial. CX3CL1 can promote cancer metastasis using various  
76 routes including bloodstream, lymphatic vessels, and nerves (Borsig *et al*, 2014),  
77 whereas CX3CL1 can prevent glioma invasion by promoting tumor cell aggregation and  
78 eventually reducing their invasiveness (Sciumè *et al*, 2010). Thus, the roles of the  
79 CX3CL1-CX3CR1 axis in carcinogenesis processes remain elusive.

80 We have previously demonstrated that the interaction between locally produced  
81 CX3CL1 and CX3CR1-expressing cells contributed crucially to the skin wound healing  
82 process by promoting the macrophage accumulation and functions of macrophages  
83 (Ishida *et al*, 2008). Based on similar changes common to the wound healing process  
84 and tumorigenesis, Dvorak proposed that tumors are wounds that do not heal (Dvorak,  
85 2015). This proposition prompted us to investigate the roles of the CX3CL1-CX3CR1  
86 axis in skin carcinogenesis. We demonstrated that CX3CL1 protein expression and  
87 CX3CR1-expressing macrophages were observed in human skin cancer tissues. In order  
88 to address the pathogenic roles of the CX3CL1-CX3CR1 axis in skin carcinogenesis,  
89 we utilized 7,12-dimethylbenz-(a)anthracene  
90 (DMBA)/12-*O*-tetradecanoylphorbol-13-acetate (TPA)-induced two-stage skin  
91 carcinogenesis, which mimics the multistage development of human skin cancer (Kemp,  
92 2005). Here, we provided definitive evidence to indicate the vital roles of the  
93 CX3CL1-CX3CR1 axis in this skin carcinogenesis model.

94 **RESULTS**

95 **CX3CL1 and CX3CR1 expression in human skin cancer tissues of basal cell**  
96 **carcinoma (BCC) and squamous cell carcinoma (SCC)**

97 The importance of the interaction between CX3CL1 and CX3CR1 has been implicated  
98 in many inflammatory diseases, including rheumatoid arthritis, vasculitis, systemic  
99 sclerosis, and atopic dermatitis (Echigo *et al*, 2004; Hasegawa *et al*, 2005; Morimura *et*  
100 *al*, 2013; Murphy *et al*, 2008). Hence, initially, we immunohistochemically examined  
101 the expression of CX3CL1 and CX3CR1 in the BCC and SCC tissues. CX3CL1 (Figure  
102 1A) and CX3CR1 (Figure 1B) were mainly detected in infiltrating leukocytes in all  
103 specimens from both the BCC or SCC lesions that we examined. Double-color  
104 immunofluorescence analyses demonstrated that CD68<sup>+</sup> macrophages, but not CD31<sup>+</sup>  
105 endothelial cells, were the main cellular source of CX3CL1 (Figure 1C and  
106 Supplemental figure 1A). Moreover, CX3CR1 was detected in both CD68<sup>+</sup>  
107 macrophages and endothelial cells (Figure 1, D and E). Most CX3CL1<sup>+</sup> cells  
108 consistently expressed CX3CR1 (Supplemental Figure 1B). These observations indicate  
109 the potential involvement of the CX3CL1-CX3CR1 axis in skin carcinogenesis,  
110 probably via its action on tumor-associated macrophages (TAMs), which  
111 simultaneously express CX3CL1 and CX3CR1.

112

113 **CX3CL1 and CX3CR1 expression in the skin after DMBA/TPA treatment**

114 Next, we examined the *Cx3cl1* and *Cx3cr1* mRNA expression in the skin of WT mice  
115 after DMBA/TPA treatment. Both *Cx3cl1* and *Cx3cr1* mRNAs were faintly detected in  
116 the skin of the untreated WT mice. DMBA/TPA treatment significantly enhanced the  
117 *Cx3cl1* and *Cx3cr1* mRNA expression in the skin later than two weeks after DMBA  
118 application (Figure 1F and G). The double-color immunofluorescence analyses further

119 demonstrated that F4/80<sup>+</sup> cells were the major cellular source of CX3CL1 (Fig. 1H),  
120 similar to the observation of the human skin cancer tissues. CX3CR1 protein was  
121 mainly detected in F4/80<sup>+</sup> macrophages (Figure 1I), and to a lesser degree in endothelial  
122 cells (Figure 1J), with is consistent with our data of the human skin cancer tissues. Thus,  
123 CX3CL1 and CX3CR1 expression was enhanced in chemical-induced mouse skin  
124 carcinogenesis, as well as in human skin cancer tissues.

125

### 126 **The pathogenic involvement of the CX3CR1-CX3CL1 axis in skin carcinogenesis**

127 In order to address the roles of the CX3CL1-CX3CR1 axis in skin carcinogenesis, WT  
128 and *Cx3cr1*<sup>-/-</sup> mice were subjected to DMBA/TPA treatment. There were no apparent  
129 differences between the skin structures of the unchallenged WT and *Cx3cr1*<sup>-/-</sup> mice  
130 (Figure 2A). On the contrary, a marked epidermal thickness was observed 20 weeks  
131 after DMBA/TPA treatment in WT, but not *Cx3cr1*<sup>-/-</sup> mice (Figure 2, A and B).  
132 Consistently, the number of Ki67<sup>+</sup> proliferating epidermal cells were significantly larger  
133 in WT mice than in *Cx3cr1*<sup>-/-</sup> mice (Figure 2, C and D). Several lines of evidence  
134 demonstrated that the activation of EGFR signal pathway was closely involved in skin  
135 carcinogenesis (Tardáguila *et al*, 2013; Sibia *et al*, 2000; Hara *et al*, 2005). Actually,  
136 EGFR signals were less activated in *Cx3cr1*<sup>-/-</sup> mice, compared with WT ones (Figure 2,  
137 E and F). Although both strains started to develop papillomas later than 10 weeks after  
138 DMBA/TPA treatment, the tumor incidence was higher in WT mice than in *Cx3cr1*<sup>-/-</sup>  
139 mice at all time points that we examined (Figure 2, G and H). As a consequence, at 20  
140 weeks after DMBA/TPA treatment, 90% of the WT mice, but only 40% of the *Cx3cr1*<sup>-/-</sup>  
141 mice developed papillomas (Figure 2H). Moreover, the average numbers of papillomas  
142 in *Cx3cr1*<sup>-/-</sup> mice were significantly lower than those in WT mice (Figure 2I). These  
143 observations would imply that the contribution of the CX3CL1-CX3CR1 axis may

144 contribute to chemical-induced skin carcinogenesis by inducing the proliferation of  
145 epidermal cells. Next, we explored the contribution of BM-derived CX3CR1<sup>+</sup> cells to  
146 skin carcinogenesis by using BM chimeric mice generated from WT and *Cx3cr1*<sup>-/-</sup> mice.  
147 Both WT and *Cx3cr1*<sup>-/-</sup> mice transplanted with WT mouse-derived BM cells exhibited a  
148 higher tumor incidence than the recipients of *Cx3cr1*<sup>-/-</sup> mouse-derived BM cells (Figure  
149 2J). The average numbers of papillomas in the mice receiving *Cx3cr1*<sup>-/-</sup>-BM cells were  
150 significantly lower than those in the mice receiving WT-BM cells (Figure 2K). These  
151 observations would imply the crucial involvement of radiosensitive BM-derived  
152 CX3CR1<sup>+</sup> cells but not radio-resistant keratinocytes in skin carcinogenesis.

153

154 **The effects of CX3CR1 deficiency on macrophage recruitment after DMBA/TPA**  
155 **treatment**

156 CX3CR1 expression in TAMs prompted us to examine the effects of CX3CR1  
157 deficiency on macrophage infiltration in this carcinogenesis process. At one week after  
158 DMBA/TPA treatment, the recruitment of F4/80<sup>+</sup> macrophages, but not Ly-6G<sup>+</sup>CD11b<sup>+</sup>  
159 neutrophils and CD3<sup>+</sup> lymphocytes, was significantly reduced in *Cx3cr1*<sup>-/-</sup> mice,  
160 compared to the case in WT mice (Figure 3, A and B). Moreover, even at 10 weeks after  
161 DMBA/TPA treatment, intradermal macrophage recruitment was attenuated in *Cx3cr1*<sup>-/-</sup>  
162 mice, compared to the case in WT mice (Figure 3, C and D). Given the important role of  
163 macrophage polarization to M2-like phenotype in carcinogenesis (Tariq *et al*, 2017;  
164 Isidro & Appleyard, 2016), we determined the expression of M2-related molecules in  
165 dermal macrophages isolated from DMBA/TPA-treated WT or *Cx3cr1*<sup>-/-</sup> mice. The  
166 numbers of the isolated whole macrophages were significantly reduced in *Cx3cr1*<sup>-/-</sup>  
167 mice, compared to the WT mice, both at 48 and 72 h after DMBA/TPA treatment  
168 (Figure 3E). Moreover, the *Cx3cr1*<sup>-/-</sup>-derived dermal macrophages exhibited a reduced

169 expression of M2-macrophage markers such as *Mrc1/Cd206*, *Cd163*, *Il10*, *Ccl17*, and  
170 *arginase1*, compared to the WT-derived dermal macrophages (Figure 4, F-J).  
171 Consistently, even at five days after DMBA/TPA treatment, CD68<sup>+</sup>CD206<sup>+</sup> M2-like  
172 macrophages numbers were reduced in *Cx3cr1*<sup>-/-</sup> mice, compared to the case in WT  
173 mice (Figure 3, K and L). Furthermore, nearly three-quarters of the CX3CR1<sup>+</sup>  
174 macrophages expressed CD206, an M2-macrophage marker (Figure 3M). A triple-color  
175 immunofluorescence analysis demonstrated that a large number of F4/80<sup>+</sup>CD206<sup>+</sup> M2  
176 macrophages expressed CX3CR1 in DMBA/TPA-induced carcinogenesis (Figure 3N).  
177 Consistently, the expression of CD163, a human M2 marker, was conspicuous in human  
178 skin cancer lesions, particularly SCC ones, compared with that of HLA class II, an M1  
179 marker (Figure 4, A-C). A triple-color immunofluorescence analysis demonstrated that a  
180 large number of CD68<sup>+</sup>CD163<sup>+</sup> M2 macrophages expressed CX3CR1 in human SCC  
181 lesions (Figure 4D). Thus, M2 macrophage infiltration could be a prominent feature of  
182 skin carcinogenesis in mice and humans. Finally, DMBA/TPA-treated WT and *Cx3cr1*<sup>-/-</sup>  
183 mice displayed similar levels of gene expression of the *Ccl2* and *Ccl3* genes, which  
184 exhibit potent chemotactic activities for macrophages but utilize distinct receptors than  
185 CX3CR1 (Supplemental figure 2). These observations imply that DMBA/TPA treatment  
186 induced the infiltration of macrophages and their subsequent polarization into the M2  
187 phenotype by inducing CX3CL1, which can act on the CX3CR1 expressed on  
188 macrophages.

189

#### 190 **Reduced neovascularization in mice lacking CX3CR1 after DMBA/TPA treatment**

191 CX3CR1 expression by CD31-positive cells incited us to examine the effects of  
192 CX3CR1 deficiency on angiogenesis during the course of skin carcinogenesis.  
193 DMBA/TPA treatment increased the intradermal vessel density in WT mice, but these



194 increments were significantly reduced in *Cx3cr1*<sup>-/-</sup> mice (Figure 5, A and B). Moreover,  
195 WT mice exhibited enhanced intradermal gene expression of *Vegf* and *Mmp9*, two  
196 potent angiogenic molecules, compared to the case in *Cx3cr1*<sup>-/-</sup> mice (Figure 5, C and  
197 D). Moreover, the VEGF and MMP9 proteins were detected mainly in CX3CR1<sup>+</sup>  
198 macrophages (Figure 5, E and F), suggesting that CX3CR1<sup>+</sup> M2-like macrophages  
199 could contribute to angiogenesis in the development of chemical-induced skin  
200 carcinogenesis. Thus, the absence of the CX3CR1 axis reduced neovascularization  
201 directly and indirectly by reducing the expression of the potent angiogenic factors,  
202 VEGF and MMP9, during the course of DMBA/TPA-induced skin carcinogenesis.

203

#### 204 **Reduced expression of Wnt3a in DMBA/TPA-treated CX3CR1<sup>-/-</sup> mice**

205 The crucial roles of  $\beta$ -catenin-mediated signaling in a variety of skin cancers (Gat *et al*,  
206 1998; Malanchi *et al*, 2008) provoked us to determine the gene expression of *Wnt3a*.  
207 Indeed, DMBA/TPA treatment enhanced the intradermal *Wnt3a* mRNA expression in  
208 WT mice later than six weeks after the treatment, but this enhancement was  
209 significantly attenuated in *Cx3cr1*<sup>-/-</sup> mice (Figure 6A). *Wnt3a*<sup>+</sup> cells were consistently  
210 detected in the skin of the WT and *Cx3cr1*<sup>-/-</sup> mice, at 10 weeks after the DMBA/TPA  
211 treatment (Figure 6B), but the number of *Wnt3a*<sup>+</sup> cells was significantly lower in  
212 *Cx3cr1*<sup>-/-</sup> mice than in WT mice (Figure 6C). A double-color immunofluorescence  
213 analysis detected *Wnt3a* in CX3CR1<sup>+</sup> and F4/80<sup>+</sup> cells, indicating that CX3CR1<sup>+</sup>  
214 M2-like macrophages could produce *Wnt3a*, eventually contributing to  
215 chemical-induced skin carcinogenesis (Figure 6, D and E). Moreover, CX3CL1  
216 augmented the *Wnt3a* expression in a mouse macrophage cell line, RAW264.7 (Figure  
217 6F). Immunohistochemical analysis demonstrated that the nuclear accumulation of  
218  $\beta$ -catenin in the epidermal cells was markedly decreased in *Cx3cr1*<sup>-/-</sup> mice, compared to

219 the case in WT mice, at 10 weeks after DMBA/TPA treatment (Figure 6G). The amount  
220 of unphosphorylated (active)  $\beta$ -catenin protein was increased in WT mice at 10 weeks  
221 after DMBA/TPA treatment but this increase was significantly lowered in *Cx3cr1*<sup>-/-</sup>  
222 mice (Figure 6, H and I). Moreover, DMBA/TPA treatment increased the *Cox2*  
223 expression in the skin of WT mice, but these increments were significantly lowered in  
224 *Cx3cr1*<sup>-/-</sup> mice at two weeks after DMBA/TPA treatment (Figure 6J). A double-color  
225 immunofluorescence analysis detected COX-2 in F4/80<sup>+</sup> and CX3CR1<sup>+</sup> cells (Figure 6,  
226 K and L). Several lines of evidence have indicated that COX-2/prostaglandin E2 can  
227 exert pro-oncogenic actions through  $\beta$ -catenin signaling (Castellone *et al*, 2005; Shao *et*  
228 *al*, 2005). Thus, locally produced CX3CL1 can recruit Wnt3a- and COX-2-expressing  
229 macrophages, and can further enhance their Wnt3a expression, thereby activating the  
230  $\beta$ -catenin signaling pathway and eventually skin carcinogenesis.

231

232 **DISCUSSION**

233 The crucial involvement of the CXCL1-CX3CR1 axis in skin wound healing incited us  
234 to examine the CX3CL1 and CX3CR1 expression in human skin cancer tissues. We  
235 detected abundant CX3CL1 expression in conditions of CX3CR1<sup>+</sup> cell infiltration in  
236 human skin cancer tissues. In order to investigate its role in skin carcinogenesis, we  
237 utilized DMBA/TPA-induced two-step skin carcinogenesis, where a single DMBA  
238 application induces DNA mutations in epidermal cells, and subsequent repeated  
239 exposure to TPA induces chronic inflammation, to accelerate tumorigenesis  
240 (DiGiovanni, 1992). Indeed, similar CX3CL1 and CX3CR1 expression patterns were  
241 observed in the skin of mice after DMBA/TPA-treatment. Moreover, given the  
242 exclusive use of CX3CR1 by its ligand, CX3CL1, reduced DMBA/TPA-induced skin  
243 carcinogenesis in CX3CR1<sup>-/-</sup> mice indicates the crucial involvement of the  
244 CX3CL1-CX3CR1 axis in this carcinogenesis model.

245 TAMs are frequently a major cell component of cancer tissues and usually lack  
246 cytotoxic activity, but exhibit M2-like phenotypes with the expression of angiogenic  
247 factors (Mantovani *et al*, 2017). Indeed, CX3CR1-expressing TAMs in the present  
248 mouse model exhibited M2-like phenotypes and expressed abundantly expressed two  
249 potent angiogenic factors, VEGF and MMP-9. CX3CR1 deficiency reduced  
250 macrophage infiltration, with depressed M2-like macrophage numbers, and reduced the  
251 expression of VEGF and MMP-9. Although TAMs are presumed to be derived mostly  
252 from circulating monocytes that are attracted towards tumor sites by locally produced  
253 chemokines including CCL2 and CCL3 (Singh *et al*, 2009; Teicher & Fricker, 2010),  
254 DMBA/TPA treatment induced CCL2 and CCL3 expression in WT and *Cx3cr1*<sup>-/-</sup> mice  
255 to similar extents. Thus, it is likely that macrophage-derived CX3CL1 directly recruited  
256 CX3CR1-expressing M2-like macrophages to tumor tissues via using an amplifying

257 autocrine loop.

258 In this carcinogenesis model, *Cx3cr1*<sup>-/-</sup> mice exhibited reduced  
259 neovascularization with depressed tumor formation, compared to the case for WT mice.  
260 Indeed, CX3CR1<sup>+</sup>TAMs expressed several angiogenic molecules including VEGF and  
261 MMP9, and the expression of these two molecules was reduced in *Cx3cr1*<sup>-/-</sup> mice,  
262 compared to the case in WT mice. Thus, neovascularization can be ascribed at least  
263 partially to TAM-derived VEGF and MMP9. Moreover, CX3CR1 expression by CD31<sup>+</sup>  
264 endothelial cells may suggest the direct involvement of the CX3CL1-CX3CR1 axis in  
265 neovascularization at tumor sites, similar to the observations in case of skin wound  
266 healing (Ishida *et al*, 2008). Nevertheless, in this skin carcinogenesis model, the  
267 CX3CL1-CX3CR1 axis could promote neovascularization directly by acting on  
268 endothelial cells and/or indirectly by inducing the production of angiogenic factors by  
269 TAMs.

270 Accumulating evidence indicates the crucial involvement of pro-inflammatory  
271 cytokines in DMBA/TPA-induced skin carcinogenesis. TPA-induced AP-1 activation in  
272 the epidermis is indispensable for tumor development, and requires TNF $\alpha$ -mediated  
273 TNF receptor signals, particularly at the early phase, in this carcinogenesis process  
274 (Moore *et al*, 1999; Arnott *et al*, 2004). IL-1 receptor-MyD88 signaling additionally  
275 contributes to keratinocyte transformation and carcinogenesis by further activating the  
276 NF- $\kappa$ B pathway (Cataisson *et al*, 2012). Moreover, TNF $\alpha$ -dependent MMP9 expression  
277 promoted epithelial cell migration during tumor promotion (Scott *et al*, 2004). Thus,  
278 these molecules can directly regulate the migration, proliferation, and transformation of  
279 keratinocytes, eventually resulting in carcinogenesis. We observed that TNF $\alpha$  and  
280 IL-1 expression was enhanced in skin carcinogenesis of WT mice and that their  
281 expression was mainly detected in F4/80<sup>+</sup> macrophages (Supplemental figure 3).

282 Moreover, their enhanced expression was attenuated in *Cx3cr1*<sup>-/-</sup> mice together with  
283 reduced F4/80<sup>+</sup> macrophage recruitment, compared to the case in WT mice. Thus,  
284 locally produced CX3CL1 recruits CX3CR1<sup>+</sup> macrophages, a rich source of these  
285 keratinocyte activators, thereby causing skin carcinogenesis.

286 Several lines of evidence have implied that CD11b<sup>+</sup>Gr1<sup>+</sup> myeloid cells had  
287 tumor-promoting roles (Kowanetz *et al*, 2010; Qian *et al*, 2011). Di Piazza *et al*. have  
288 demonstrated that these cells could exert this effect by augmenting Wnt/ $\beta$ -catenin  
289 signaling in neighboring epithelial cells via the secretion of Wnt ligands (Di Piazza *et al*,  
290 2012). Consistent with this observation, we also observed that TAMs were a major  
291 source of Wnt3a. Moreover, CX3CL1-CX3CR1 signaling augmented Wnt3a expression  
292 in a mouse macrophage cell line and *Cx3cr1*<sup>-/-</sup> mice exhibited depressed Wnt3a  
293 expression. Furthermore, we observed enhanced COX-2 expression in F4/80<sup>+</sup>  
294 macrophages. Given the capacity of prostaglandin E<sub>2</sub> to trigger the Wnt/ $\beta$ -catenin  
295 pathway (Castellone *et al*, 2005; Shao *et al*, 2005), macrophage-derived COX-2 can  
296 activate this pathway. Nevertheless, CX3CL1 can activate the Wnt/ $\beta$ -catenin pathway,  
297 which is crucially involved in skin carcinogenesis, by attracting CX3CR1<sup>+</sup> macrophages  
298 with a capacity to express Wnt3a and/or COX-2.

299 The activation of EGFR signal pathway was crucially involved in tumor  
300 proliferation including skin cancer (Tardáguila *et al*, 2013; Sibilía *et al*, 2000; Hara *et al*,  
301 2005). In line with this, we found that the absence of CX3CR1 suppressed skin  
302 carcinogenesis with reduced TAM recruitment and less activation of EGFR signal  
303 pathway. Tardáguila and colleagues (Tardáguila *et al*, 2013) demonstrated that the  
304 CX3CL1-CX3CR1 axis promoted breast cancer through the transactivation of EGFR  
305 signals. However, CX3CL1 could not directly act on epidermal cells in  
306 chemical-induced skin carcinogenesis, since CX3CR1 was not expressed on epidermal

307 cells. TAM produced EGF which can directly act on EGFR-expressing epidermal cells  
308 (Quail & Joyce, 2013). Thus, the attenuation of EGFR signal pathway was attributable  
309 to the reduced TAM recruitment in *Cx3cr1*<sup>-/-</sup> mice.

310 Collectively, the present observations reveal the pivotal involvement of the  
311 CX3CL1-CX3CR1 axis in several steps during chemical-induced skin carcinogenesis.  
312 Moreover, abundant CX3CL1 expression and CX3CR1<sup>+</sup> macrophages in human skin  
313 cancer tissues will further support the notion that the CX3CL1-CX3CR1 axis can be a  
314 novel target for the prevention and/or treatment of human skin cancer.  
315

316 **MATERIALS AND METHODS**

317 **Reagents and antibodies (Abs)**

318 7,12-dimethylbenz(a)anthracene (DMBA) and 12-*O*-tetradecanoylphorbol-13-acetate  
319 (TPA) were purchased from Sigma Chemical Co. (St. Louis, MO). Recombinant murine  
320 CX3CL1 was obtained from R&D Systems (Minneapolis, MN). The following  
321 monoclonal Abs (mAbs) and polyclonal Abs (pAbs) were used for  
322 immunohistochemical and immunofluorescence analyses; goat anti-mouse CX3CL1  
323 pAbs, which cross-react with human CX3CL1, goat anti-mouse COX2 pAbs, goat  
324 anti-mouse VEGF pAbs, goat anti-mouse MMP-9 pAbs (Santa Cruz Biotechnology,  
325 Santa Cruz, CA), goat anti-human TNF $\alpha$  pAbs, which cross-react with mouse TNF $\alpha$ ,  
326 goat anti-human Wnt3a pAbs, which cross-react with mouse Wnt3a, goat anti-mouse  
327 CD31 pAbs, which cross-react with human CD31, rabbit anti-mouse IL-1 $\alpha$  pAbs  
328 (Abcam, Cambridge, UK), rabbit anti-human IL-1 $\beta$  pAbs, which cross-react with mouse  
329 IL-1 $\beta$  (Santa Cruz Biotechnology, Santa Cruz, CA), rabbit anti-human CX3CR1 pAbs,  
330 which cross-react with mouse CX3CR1 (Abnova, Walnut, CA), rat anti-mouse F4/80  
331 mAb (clone, BM8; BMA Biomedicals, Switzerland), rabbit anti-human CD3 pAbs,  
332 which cross-react with mouse CD3 (Dako Cytomation, Kyoto, Japan), rat anti-mouse  
333 F4/80 mAb (clone, A3-1; AbD Serotec, Oxford, UK), mouse anti-human CD68 mAb  
334 (clone, 514H12; PIERCE, Aunnyvale, CA), rabbit anti-mouse Ki67 mAb (clone, D3B5;  
335 Cell Signaling, Danvers, MA), mouse anti-human HLA-DR $\alpha$  mAb (clone, TAL. 1B5;  
336 Dako Cytomation), mouse anti-human CD163 mAb (clone, 10D6; Leica Biosystems,  
337 Buffalo Grove, IL), rabbit anti-mouse  $\beta$ -catenin pAbs (Proteintech, Rosemont, IL),  
338 rabbit anti-mouse Keratin1 pAbs (BioLegend, San Diego, CA), Cy3-conjugated donkey  
339 anti-rat IgG pAbs, FITC-conjugated donkey anti-goat IgG pAbs, FITC-conjugated  
340 donkey anti-rabbit IgG pAbs (Jackson ImmunoResearch Laboratories, West Grove, PA),

341 rabbit anti-human Wnt3a pAbs which cross-reacts with mouse Wnt3a, and rabbit  
342 anti-IL-1 $\alpha$  pAbs, which react with mouse IL-1 $\alpha$  (Abcam, Cambridge, UK). For flow  
343 cytometric analyses, the following Abs were commercially obtained; PE-conjugated rat  
344 anti-mouse Ly-6G mAb (clone 1A8, BD Bioscience, San Jose, CA),  
345 violetFluor450-conjugated rat anti-mouse CD11b mAb (clone M1/70, TONBO, San  
346 Diego, CA), APC-conjugated rat anti-mouse F4/80 mAb (clone BM8.1,\_TONBO),  
347 FITC-conjugated rat anti-mouse CD3 mAb (clone 17A2, TONBO),  
348 PerCP/Cy5.5-conjugated rat anti-mouse CD45 mAb (clone 30-F11, BioLegend, San  
349 Diego, CA), FITC-conjugated rat anti-mouse CD68 mAb (clone FA-11, Bio-Rad,  
350 Oxford, UK), PE-conjugated rat anti-mouse CD206 mAb (clone MR6F3, Thermo Fisher,  
351 Waltham, MA), APC-conjugated rat anti-mouse CD86 mAb (clone GL-1, TONBO), and  
352 PerCP-conjugated goat anti-mouse CX3CR1 pAbs (R&D Systems, Minneapolis, MN).  
353 For Western blotting analyses, the following Abs were used; rabbit anti-mouse EGFR  
354 mAb (clone D38B1, #4267), rabbit anti-mouse phosphorylated (p)-EGFR mAb (clone  
355 D7A5, #3777), rabbit anti-mouse  $\beta$ -catenin (active) mAb (clone D13A1, #8814), and  
356 rabbit anti-mouse GAPDH mAb (clone D16H11, #5174, Cell Signaling, Danvers, MA).

357

### 358 **Mice**

359 Pathogen-free 8-week-old male C57BL/6 mice were obtained from Sankyo Laboratories  
360 (Tokyo, Japan) and designated as wild-type (WT) mice. CX3CR1-deficient (*Cx3cr1*<sup>-/-</sup>)  
361 mice with the C57BL/6 genetic background were a generous gift from Drs. P. M.  
362 Murphy and J. L. Gao (National Institute of Allergy and Infectious Diseases, National  
363 Institutes of Health, Bethesda, MD) (Ishida *et al*, 2008). All animals were housed  
364 individually in cages under specific pathogen-free conditions during the experiments.  
365 Age- and sex-matched mice were used for the experiments. All animal experiments



366 complied with the standards set by the Guidelines for the Care and Use of Laboratory  
367 Animals at the Wakayama Medical University.

368

### 369 **Human skin cancer tissues**

370 Skin cancer tissue specimens (basal cell carcinoma (BCC), n=5, cases 1 to 5; squamous  
371 cell carcinoma (SCC), n=5, cases 6 to 10) were obtained by biopsy from the patients in  
372 the Wakayama Medical University Hospital after obtaining their informed consent for  
373 diagnosis (Supplemental Table 1). Using the densitometric tool of PhotoShop, the  
374 extents of HLA-DR $\alpha$ - or CD163-positivity were measured in the human BCC and SCC  
375 specimens, and were expressed as the pixel number per field ( $\times 200$ ). The study design  
376 was approved by the Local Ethical Committee of the Wakayama Medical University  
377 Hospital.

378

### 379 **Skin carcinogenesis**

380 Skin tumors were induced by two-step application of DMBA and TPA as described  
381 previous study (Wang *et al*, 2010). First, 25  $\mu$ g of DMBA in 100  $\mu$ l of acetone was  
382 applied onto the shaved dorsal skin of the mice. One week later, 30  $\mu$ g of TPA in 100  $\mu$ l  
383 of acetone was applied topically twice a week for 20 weeks. Tumor development was  
384 monitored on a weekly basis and lesions greater than 2 mm in length were counted as  
385 positive.

386

### 387 **Generation of bone marrow (BM) chimeric mice**

388 The following BM chimeric mice were prepared: male *Cx3cr1*<sup>-/-</sup> BM to female WT  
389 mice, male WT BM to female WT mice, male WT BM to female *Cx3cr1*<sup>-/-</sup> mice, and  
390 male *Cx3cr1*<sup>-/-</sup> BM to female *Cx3cr1*<sup>-/-</sup> mice. BM cells were collected from the femurs

391 of donor mice by aspiration and flushing. Recipient mice were irradiated with a  
392 radiation dose of 12 Gy using an RX-650 irradiator (Faxitron X-ray Inc., Wheeling,  
393 IL). Then, the animals intravenously received  $5 \times 10^6$  BM cells from the donor mice in a  
394 volume of 200  $\mu$ l of sterile PBS under anesthesia. Thereafter, mice were housed in  
395 sterilized microisolator cages and were fed normal chow and autoclaved  
396 hyperchlorinated water for 60 days. To verify successful engraftment and reconstitution  
397 of the BM in the transplanted mice, genomic DNA was isolated from the peripheral  
398 blood and tail tissues of each chimeric mouse 30 days after BM transfer using a  
399 NucleoSpin tissue kit (Macherey-Nagel, Duren, Germany). Then, we performed PCR to  
400 detect the *Sry* gene contained in the Y chromosome (F, 5'-TTGCCTCAACAAAA-3'; R,  
401 5'-AAACTGCTGCTTCTGCTGGT-3'). The amplified PCR products were fractionated  
402 on a 2% agarose gel and visualized by ethidium bromide staining. After durable BM  
403 engraftment was confirmed, the mice were treated with DMBA/TPA as described above.

404

#### 405 **Histopathological and immunohistochemical analyses**

406 At the indicated time intervals after DMBA application, skin tissues were removed,  
407 fixed in 10% formalin buffered with PBS (pH 7.2), and embedded in paraffin.  
408 Six- $\mu$ m-thick sections were prepared and stained with hematoxylin and eosin.  
409 Epidermal thickness was measured using Photoshop (at 40 $\times$  magnifications).  
410 Immunohistochemical analyses were also performed using anti-F4/80, anti-CD31 mAb,  
411 anti-Ki67, anti-VEGF, anti- $\beta$ -catenin, or anti-Wnt3a Abs as described in a previous  
412 report (Ishida *et al*, 2012). The numbers of positive cells or CD31-positive tube-like  
413 vessels were counted on five randomly chosen visual fields at 200-fold magnifications,  
414 and the average of the five selected microscopic fields was calculated. All  
415 measurements were performed by an examiner without prior knowledge regarding the

416 experimental procedures. A double- or triple-color immunofluorescence analysis was  
417 also conducted to identify the types of CX3CL1-, CX3CR1-, VEGF-, MMP-9-, COX-2-  
418 or Wnt3-expressing cells in the skin, as described in a previous report (Inui *et al*, 2011).

419

#### 420 **Quantitative RT-PCR analysis**

421 Total RNA was extracted from skin tissue using ISOGEN (Nippon Gene, Toyama,  
422 Japan), according to the manufacturer's instructions. Next, 3 µg of total RNA was  
423 reverse transcribed to cDNA with Oligo(dT)<sub>15</sub> primers using PrimeScript™ Reverse  
424 Transcriptase (Takara Bio, Shiga, Japan). The resultant cDNA was subjected to  
425 real-time PCR by using SYBR® Premix Ex Taq™ II (Takara Bio) and specific primer  
426 sets (Takara Bio), as described in a previous report (Inui *et al*, 2011) (Supplemental  
427 Table 2). Amplification and detection of mRNA were conducted by using the Thermal  
428 Cycler Dice® Real Time System (Takara Bio, TP800), according to the manufacturer's  
429 instructions. To standardize the mRNA concentrations, transcript levels of β-actin were  
430 determined in parallel for each sample, and relative transcript levels were normalized  
431 based to the β-actin transcript levels.

432

#### 433 **Flow cytometry analysis**

434 Single-cell suspensions were prepared from wound tissue homogenates, as described in  
435 a previous report (Ishida *et al*, 2012). Contaminated red blood cells were hemolyzed  
436 using ammonium chloride solution (IMGENEX). The resulting single-cell suspensions  
437 were incubated with the antibodies for 20 minutes on ice. Isotype-matched control  
438 immunoglobulins were used to detect the nonspecific binding of immunoglobulin in the  
439 samples. The stained cells were analyzed on a CytoFLEX S system (Beckman Coulter,  
440 Brea, CA), and the obtained data were analyzed using the CytExpert 2.2 software

441 (Beckman Coulter).

442

443 **Separation of F4/80<sup>+</sup> cells by magnetic-activated cell sorting (MACS)**

444 Skin cells were harvested, prepared into single-cell suspensions, and counted as  
445 described in a previous study (Ishida *et al*, 2012). All the incubations were conducted at  
446 4°C for 20 min. To isolate the F4/80-positive cell population, the resultant single-cell  
447 preparation was stained with anti-F4/80 MicroBeads UltraPure mouse Abs (Miltenyi  
448 Biotec, Sunnyvale, CA). The sorting column was fixed on a MACS stand (Miltenyi  
449 Biotec) and equilibrated by using 500 µl of PBS containing 0.5% BSA. After the cell  
450 suspension was passed through a MACS MS separation column that was placed in mini  
451 MACS, the obtained F4/80<sup>+</sup> cell fraction exhibited a purity of more than 95 %, as  
452 determined using a flow cytometer.

453

454 **Western blotting analysis**

455 Skin samples were homogenized and the resultant lysates (30 µg) were electrophoresed  
456 on a 7.5% sodium dodecyl sulfate-polyacrylamide gel (SDS-PAGE) gel and transferred  
457 onto a nitrocellulose membrane. The membrane was then incubated with 1,000-fold  
458 diluted Abs against β-catenin (active), EGFR, p-EGFR, or GAPDH. After the  
459 incubation of the membrane with HRP-conjugated secondary Abs, the immune  
460 complexes were visualized using the ECL Plus System (Amersham Biosciences Corp.,  
461 Piscataway, NJ), according to the manufacturer's instructions.

462

463 **In vitro assay**

464 Cells from the mouse macrophage cell line RAW264.7 cells were cultured in DMEM  
465 medium containing 10% fetal bovine serum, seeded at a density  $1 \times 10^6$  cells/well into

466 six-well plates, and cultured overnight. After the cells were stimulated further with  
467 various concentrations of recombinant mouse CX3CL1 for 2 h at 37°C, the supernatants  
468 were collected, and the Wnt3a protein levels in these supernatants were determined  
469 using a commercially available ELISA kit (My Biosource, San Diego, CA), according  
470 to the manufacturer's instructions. The detection limits of Wnt3a was > 23.5 ng/ml.

471

#### 472 **Statistical analysis**

473 Data were expressed as the mean  $\pm$  SEM. For the comparison between WT and  
474 *Cx3cr1*<sup>-/-</sup> mice at multiple time points, two-way ANOVA, followed by Dunnett's  
475 post-hoc test, was used. To compare the values between two groups, unpaired Student's  
476 *t* test was performed. In case of the series of CCL3 stimulations of RAW264.7 cells for  
477 the in vitro and the flow cytometric analysis, one-way ANOVA, followed by Dunnett's  
478 post hoc test, was used.  $P < 0.05$  was considered statistically significant. All statistical  
479 analyses were performed using the Statcel3 software under the supervision of a medical  
480 statistician.

481

#### 482 **Study approval**

483 Human samples were obtained under the approval by the Institutional Review Boards of  
484 Wakayama Medical University. Informed consent was received from participants prior  
485 to inclusion in the study. All animal experiments were approved by the Committee on  
486 Animal Care and Use at Wakayama Medical University. All methods were performed in  
487 accordance with the relevant guidelines and regulations.

488

#### 489 **Acknowledgments**

490 This work was supported in part by Grants-in-Aids for Scientific Research (A) (grant  
491 20249040, to T. Kondo) and for Young Scientists (A) (grant 20689015, to Y. Ishida)  
492 from the Ministry of Education, Culture, Science, and Technology of Japan and by  
493 Research Grant on Priority Areas (to T. Kondo) from Wakayama Medical University,  
494 and MEXT Joint Usage/Research Center, operated by Cancer Research Institute,  
495 Kanazawa University.

496

#### 497 **Competing interests**

498 The authors declare no competing financial interests.

499

#### 500 **AUTHOR CONTRIBUTIONS**

501 Y.I and T.K formulated the hypothesis and designed the project; Y.I performed the main  
502 experiments; A.K provided technical assistance and discussion; Y.K and M.N helped  
503 with some experimental procedures; Y.Y and F.F helped to collect human skin cancer  
504 samples; N.M and T.K oversaw the experiments and provided the main funding for the  
505 project; Y.I, N.M, and T.K participated in writing the manuscript.

506

#### 507 **Data availability**

508 No datasets were generated or analyzed during the current study.

509

#### 510 **The Paper Explained**

##### 511 **Problem**

512 CX3CL1-CX3CR1 axis has been associated with various diseases. Previous studies  
513 have shown that CX3CL1 promotes cancer metastasis using various routes including  
514 bloodstream, lymphatic vessels, and nerves, whereas CX3CL1 prevents glioma invasion

515 by promoting tumor cell aggregation and eventually reducing their invasiveness. The  
516 roles of CX3CL1-CX3CR1 axis in skin carcinogenesis still remains unknown.

517

### 518 **Results**

519 DMBA/TPA-induced tumor incidence in *Cx3cr1*<sup>-/-</sup> mice was significantly reduced in  
520 comparison to that in WT mice. Infiltration of CX3CR1<sup>+</sup> tumor-associated macrophages  
521 with M2-like phenotypes and the expression levels of angiogenic molecules including  
522 VEGF and MMP-9 were decreased in the skin tumor tissues of *Cx3cr1*<sup>-/-</sup> mice compared  
523 with WT mice. Using macrophage cell line RAW264.7 in vitro, we found that CX3CL1  
524 associated with Wnt3a, which have tumor-promoting roles. Reduced expression of  
525 Wnt3a was identified in DMBA/TPA-induced skin tissues of *Cx3cr1*<sup>-/-</sup> mice compared  
526 to that in WT mice.

527

### 528 **Impact**

529 These findings indicated that CX3CR1 deficiency suppressed skin carcinogenesis  
530 through the inhibition of the inflammatory tumor microenvironment by the  
531 downregulation of VEGF, MMP-9, and Wnt3a in M2-macrophages. Moreover,  
532 abundant CX3CL1 expression and CX3CR1<sup>+</sup> macrophages in human skin cancer tissues  
533 further support the notion that CX3CL1-CX3CR1 axis can be a novel target for  
534 preventing and/or treating skin cancers.

535

536

537 **REFERENCES**

- 538 Allavena P, Germano G, Marchesi F, Mantovani A (2011) Chemokines in cancer related  
539 inflammation. *Exp Cell Res* 317, 664-673
- 540 Arnott CH, Scott KA, Moore RJ, Robinson SC, Thompson RG, Balkwill FR (2004)  
541 Expression of both TNF- $\alpha$  receptor subtypes is essential for optimal skin tumour  
542 development. *Oncogene* 23, 1902-1910
- 543 Balkwill F (2004) Cancer and the chemokine network. *Nat Rev Cancer* 4, 540-550
- 544 Balkwill FR (2012) The chemokine system and cancer. *J Pathol* 226, 148-157
- 545 Borsig L, Wolf MJ, Roblek M, Lorentzen A, Heikenwalder M (2014) Inflammatory  
546 chemokines and metastasis--tracing the accessory. *Oncogene* 33, 3217-3224
- 547 Castellone MD, Teramoto H, Williams BO, Druey KM, Gutkind JS (2005)  
548 Prostaglandin E<sub>2</sub> promotes colon cancer cell growth through a G<sub>s</sub>-axin- $\beta$ -catenin  
549 signaling axis. *Science* 310, 1504-1510
- 550 Cataisson C, Salcedo R, Hakim S, Moffitt BA, Wright L, Yi M, Stephens R, Dai RM,  
551 Lyakh L, Schenten D, Yuspa H.S, Trinchieri G (2012) IL-1R-MyD88 signaling in  
552 keratinocyte transformation and carcinogenesis. *J Exp Med* 209, 1689-1702
- 553 Celesti G, Di Caro G, Bianchi P, Grizzi F, Marchesi F, Basso G, Rahal D, Delconte G,  
554 Catalano M, Cappello P, Roncalli M, Zerbi A, Montorsi M, Novelli F, Mantovani  
555 A, Allavena P, Malesci A, Laghi L (2013) Early expression of the fractalkine  
556 receptor CX3CR1 in pancreatic carcinogenesis. *Br J Cancer* 109, 2424-2433
- 557 Coussens LM, Werb Z (2002) Inflammation and cancer. *Nature* 420, 860-867
- 558 DiGiovanni J (1992) Multistage carcinogenesis in mouse skin. *Pharmacol Ther* 54,  
559 63-128
- 560 Di Piazza M, Nowell CS, Koch U, Durham AD, Radtke F (2012) Loss of cutaneous  
561 TSLP-dependent immune responses skews the balance of inflammation from



- 562 tumor protective to tumor promoting. *Cancer Cell* 22, 479-493
- 563 Dvorak HF (2015) Tumors: wounds that do not heal-redux. *Cancer Immunol Res* 3, 1-11
- 564 Echigo T, Hasegawa M, Shimada Y, Takehara K, Sato S (2004) Expression of  
565 fractalkine and its receptor, CX3CR1, in atopic dermatitis: possible contribution to  
566 skin inflammation. *J Allergy Clin Immunol* 113, 940-948
- 567 Gat U, DasGupta R, Degenstein L, Fuchs E (1998) De Novo hair follicle  
568 morphogenesis and hair tumors in mice expressing a truncated  $\beta$ -catenin in skin.  
569 *Cell* 95, 605-614
- 570 Hara T, Saito Y, Hirai T, Nakamura K, Nakao K, Katsuki M, Chida K (2005) Deficiency  
571 of protein kinase C $\alpha$  in mice results in impairment of epidermal hyperplasia and  
572 enhancement of tumor formation in two-stage skin carcinogenesis. *Cancer Res* 65,  
573 7356-7362
- 574 Hasegawa M, Sato S, Echigo T, Hamaguchi Y, Yasui M, Takehara K (2005) Up  
575 regulated expression of fractalkine/CX3CL1 and CX3CR1 in patients with  
576 systemic sclerosis. *Ann Rheum Dis* 64, 21-28
- 577 Inui M, Ishida Y, Kimura A, Kuninaka Y, Mukaida N, Kondo T (2011) Protective roles  
578 of CX3CR1-mediated signals in toxin A-induced enteritis through the induction of  
579 heme oxygenase-1 expression. *J Immunol* 186, 423-431
- 580 Isidro RA, Appleyard CB (2016) Colonic macrophage polarization in homeostasis,  
581 inflammation, and cancer. *Am J Physiol Gastrointest Liver Physiol* 311, G59-73
- 582 Ishida Y, Gao JL, Murphy PM (2008) Chemokine receptor CX3CR1 mediates skin  
583 wound healing by promoting macrophage and fibroblast accumulation and  
584 function. *J Immunol* 180, 569-579
- 585 Ishida Y, Kimura A, Kuninaka Y, Inui M, Matsushima K, Mukaida N, Kondo T (2012)  
586 Pivotal role of the CCL5/CCR5 interaction for recruitment of endothelial

- 587 progenitor cells in mouse wound healing. *J Clin Invest* 122, 711-721
- 588 Kemp CJ (2005) Multistep skin cancer in mice as a model to study the evolution of  
589 cancer cells. *Semin Cancer Biol* 15, 460-473
- 590 Kim M, Rooper L, Xie J, Kajdacsy-Balla AA, Barbolina MV (2012) Fractalkine  
591 receptor CX<sub>3</sub>CR1 is expressed in epithelial ovarian carcinoma cells and required  
592 for motility and adhesion to peritoneal mesothelial cells. *Mol Cancer Res* 10,  
593 11-24
- 594 Kowanetz M, Wu X, Lee J, Tan M, Hagenbeek T, Qu X, Yu L, Ross J, Korsisaari N,  
595 Cao T, Bou-Reslan H, Kallop D, Weimer R, Ludlam MJ, Kaminker JS, Modrusan  
596 Z, van Bruggen N, Peale FV, Carano R, Meng YG, Ferrara N (2010)  
597 Granulocyte-colony stimulating factor promotes lung metastasis through  
598 mobilization of Ly6G<sup>+</sup>Ly6C<sup>+</sup> granulocytes. *Proc Natl Acad Sci U S A* 107,  
599 21248-21255
- 600 Malanchi I, Peinado H, Kassen D, Hussenet T, Metzger D, Chambon P, Huber M, Hohl  
601 D, Cano A, Birchmeier W, Huelsken J (2008) Cutaneous cancer stem cell  
602 maintenance is dependent on  $\beta$ -catenin signalling. *Nature* 452, 650-653
- 603 Mantovani A, Allavena P, Sica A, Balkwill F (2008) Cancer-related inflammation.  
604 *Nature* 454, 436-444
- 605 Mantovani A, Savino B, Locati M, Zammataro L, Allavena P, Bonecchi R (2010) The  
606 chemokine system in cancer biology and therapy. *Cytokine Growth Factor Rev* 21,  
607 27-39
- 608 Mantovani A, Marchesi F, Malesci A, Laghi L, Allavena P (2017) Tumour-associated  
609 macrophages as treatment targets in oncology. *Nat Rev Clin Oncol* 14, 399-416
- 610 Moore RJ, Owens DM, Stamp G, Arnott C, Burke F, East N, Holdsworth H, (1999)  
611 Turner L., Rollins B., Pasparakis M., Kollias G., Balkwill F., Mice deficient in

- 612 tumor necrosis factor- $\alpha$  are resistant to skin carcinogenesis. *Nat Med* 5, 828-831
- 613 Morimura S, Sugaya M, Sato S (2013) Interaction between CX3CL1 and CX3CR1  
614 regulates vasculitis induced by immune complex deposition. *Am J Pathol* 182,  
615 1640-1647
- 616 Murphy G, Caplice N, Molloyz M (2008) Fractalkine in rheumatoid arthritis: a review  
617 to date. *Rheumatology (Oxford)* 47, 1446-1451
- 618 Qian BZ, Li J, Zhang H, Kitamura T, Zhang J, Campion LR, Kaiser EA, Snyder LA,  
619 Pollard JW (2011) CCL2 recruits inflammatory monocytes to facilitate  
620 breast-tumour metastasis. *Nature* 475, 222-225
- 621 Quail DF, Joyce JA (2013) Microenvironmental regulation of tumor progression and  
622 metastasis. *Nat Med* 19, 1423-1437
- 623 Rossi D, Zlotnik A (2000) The biology of chemokines and their receptors. *Annu Rev*  
624 *Immunol* 18, 217-242
- 625 Sciumè G, Soriani A, Piccoli M, Frati L, Santoni A, Bernardini G (2010)  
626 CX3CR1/CX3CL1 axis negatively controls glioma cell invasion and is modulated  
627 by transforming growth factor- $\beta$ 1. *Neuro Oncol* 12, 701-710
- 628 Scott KA, Arnott CH, Robinson SC, Moore RJ Thompson RG, Marshall JF, Balkwill  
629 FR, (2004) TNF- $\alpha$  regulates epithelial expression of MMP-9 and integrin  $\alpha$ v $\beta$ 6  
630 during tumour promotion. A role for TNF- $\alpha$  in keratinocyte migration? *Oncogene*  
631 23, 6954-6966
- 632 Shao J, Jung C, Liu C, Sheng H (2005) Prostaglandin E<sub>2</sub> Stimulates the  $\beta$ -catenin/T cell  
633 factor-dependent transcription in colon cancer. *J Biol Chem* 280, 26565-26572
- 634 Shulby SA, Dolloff NG, Stearns ME, Meucci O, Fatatis A (2004) CX3CR1-fractalkine  
635 expression regulates cellular mechanisms involved in adhesion, migration, and  
636 survival of human prostate cancer cells. *Cancer Res* 64, 4693-4698

- 637 Sibilia M, Fleischmann A, Behrens A, Stingl L, Carroll J, Watt FM, Schlessinger J,  
638 Wagner EF (2000) The EGF receptor provides an essential survival signal for  
639 SOS-dependent skin tumor development. *Cell* 102, 211-220
- 640 Singh S, Nannuru KC, Sadanandam A, Varney ML, Singh R.K (2009) CXCR1 and  
641 CXCR2 enhances human melanoma tumorigenesis, growth and invasion. *Br J*  
642 *Cancer* 100, 1638-1646
- 643 Sugaya M (2015) Chemokines and skin diseases. *Arch Immunol Ther Exp (Warsz)* 63,  
644 109-115
- 645 Tardáguila M, Mira E, García-Cabezas MA, Feijoo AM, Quintela-Fandino M, Azcoitia I,  
646 Lira SA, Mañes S (2013) CX3CL1 promotes breast cancer via transactivation of  
647 the EGF pathway. *Cancer Res* 73, 4461-4473
- 648 Tariq M, Zhang J, Liang G, Ding L, He Q, Yang B (2017) Macrophage Polarization:  
649 Anti-Cancer Strategies to Target Tumor-Associated Macrophage in Breast Cancer.  
650 *J Cell Biochem* 118, 2484-2501
- 651 Teicher BA, Fricker SP (2010) CXCL12 (SDF-1)/CXCR4 pathway in cancer. *Clin*  
652 *Cancer Res* 16, 2927-2931
- 653 Tsang JY, Ni Y.B, Chan SK, Shao MM, Kwok YK, Chan KW, Tan PH, Tse GM (2013)  
654 CX3CL1 expression is associated with poor outcome in breast cancer patients.  
655 *Breast Cancer Res Treat* 140, 495-504
- 656 Wang L, Yi T, Zhang W, Pardoll DM, Yu H (2010) IL-17 enhances tumor development  
657 in carcinogen-induced skin cancer. *Cancer Res* 70, 10112-10120
- 658 Yao X, Qi L, Chen X, Du J, Zhang Z, Liu S (2014) Expression of CX3CR1 associates  
659 with cellular migration, metastasis, and prognosis in human clear cell renal cell  
660 carcinoma. *Urol Oncol* 32, 162-170
- 661 Zheng J, Yang M, Shao J, Miao Y, Han J, Du J (2013) Chemokine receptor CX3CR1

662 contributes to macrophage survival in tumor metastasis. *Mol Cancer* 12, 141

663

664

665 **FIGURES**

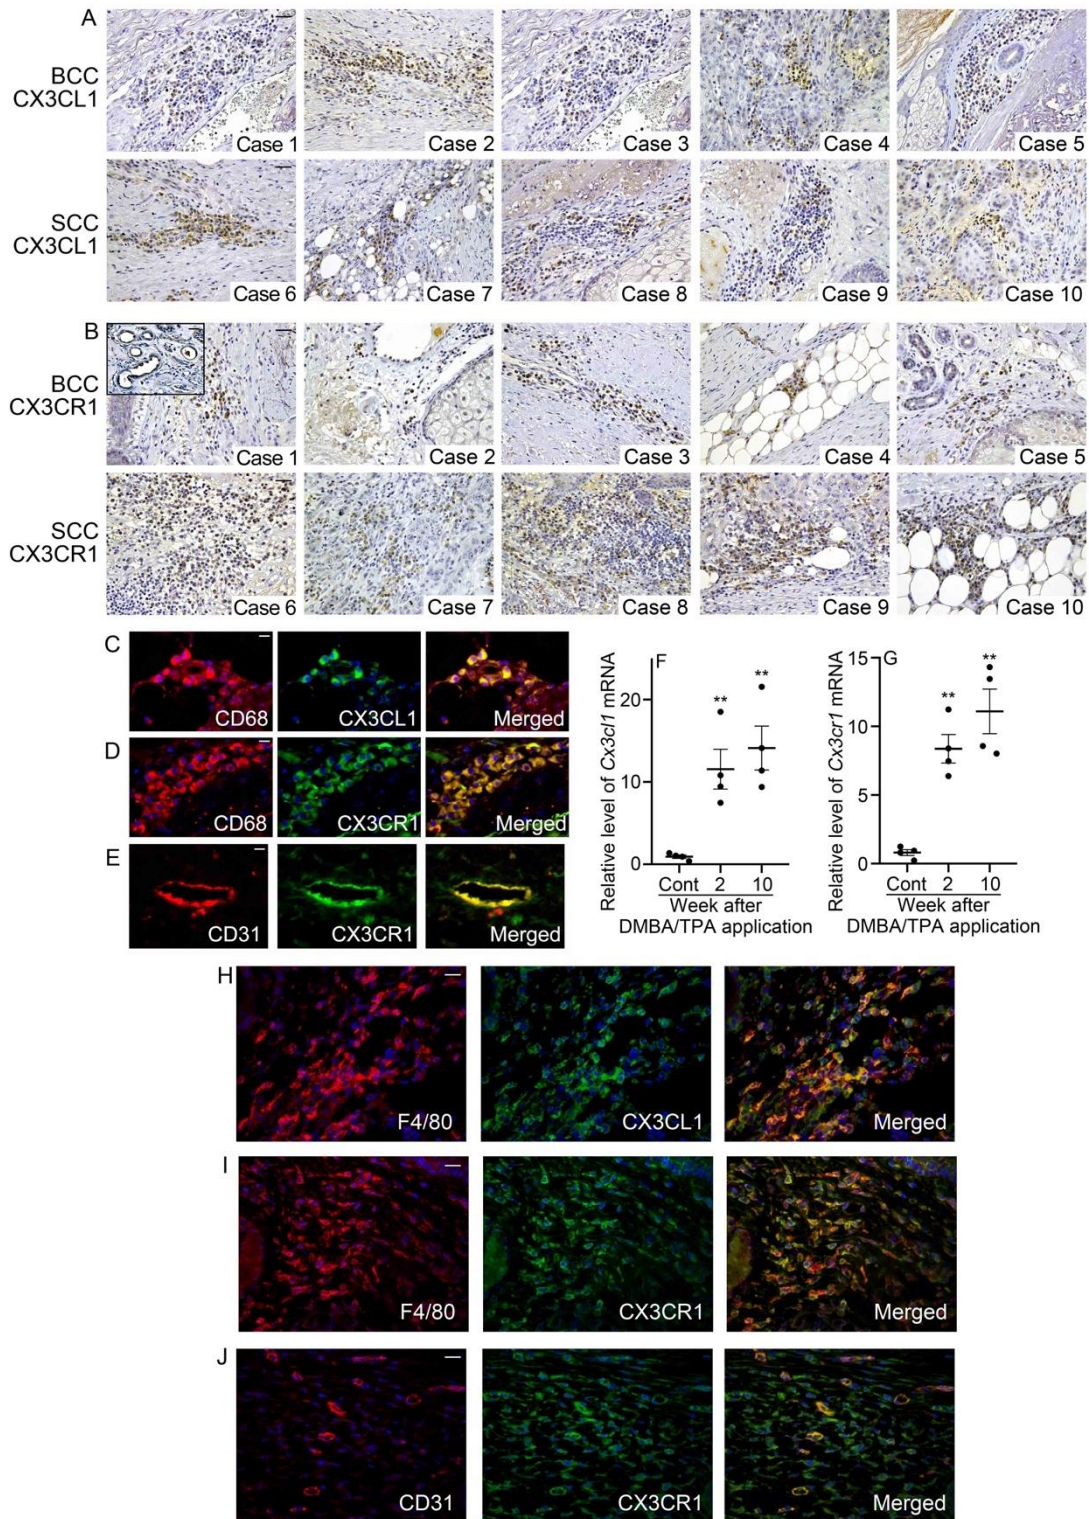

Figure 1

666

667 **Figure 1.** CX3CL1 and CX3CR1 expression in skin cancer. (A and B) The expression  
668 of CX3CL1 (A) and CX3CR1 (B) in the human BCC (Case 1-5) and SCC tissues (Case  
669 6-10). The samples were processed to immunohistochemical analysis using  
670 anti-CX3CL1 or anti-CX3CR1 antibodies. Representative results are shown here. Scale  
671 bars, 50  $\mu\text{m}$ ; scale bars in inserts, 40  $\mu\text{m}$ . (C-E) Cell types expressing CX3CL1 and  
672 CX3CR1 in the human skin cancer. Double-color immunofluorescence analyses were  
673 performed on human skin cancer tissues. Representative results are shown here. Signals  
674 were merged digitally. Scale bars, 20  $\mu\text{m}$ . (F and G) The expression of *Cx3cl1* (F) and  
675 *Cx3cr1* (G) mRNA in the skin of WT mice after DMBA/TPA treatment. Quantitative  
676 RT-PCR analyses of *Cx3cl1* and *Cx3cr1* mRNA was carried out. Values represent mean  
677  $\pm$  SEM (n=6). \*,  $P < 0.05$ ; \*\*,  $P < 0.01$ , vs. unchallenged skin, by 2-way ANOVA  
678 followed by Dunnett's post-hoc test. (H-J) Cell types expressing CX3CL1 and CX3CR1  
679 in the skin of DMBA/TPA-treated WT mice. Double-color immunofluorescence  
680 analyses were performed. Representative results from six individual animals are shown  
681 here. Signals were merged digitally. Scale bars, 20  $\mu\text{m}$ .

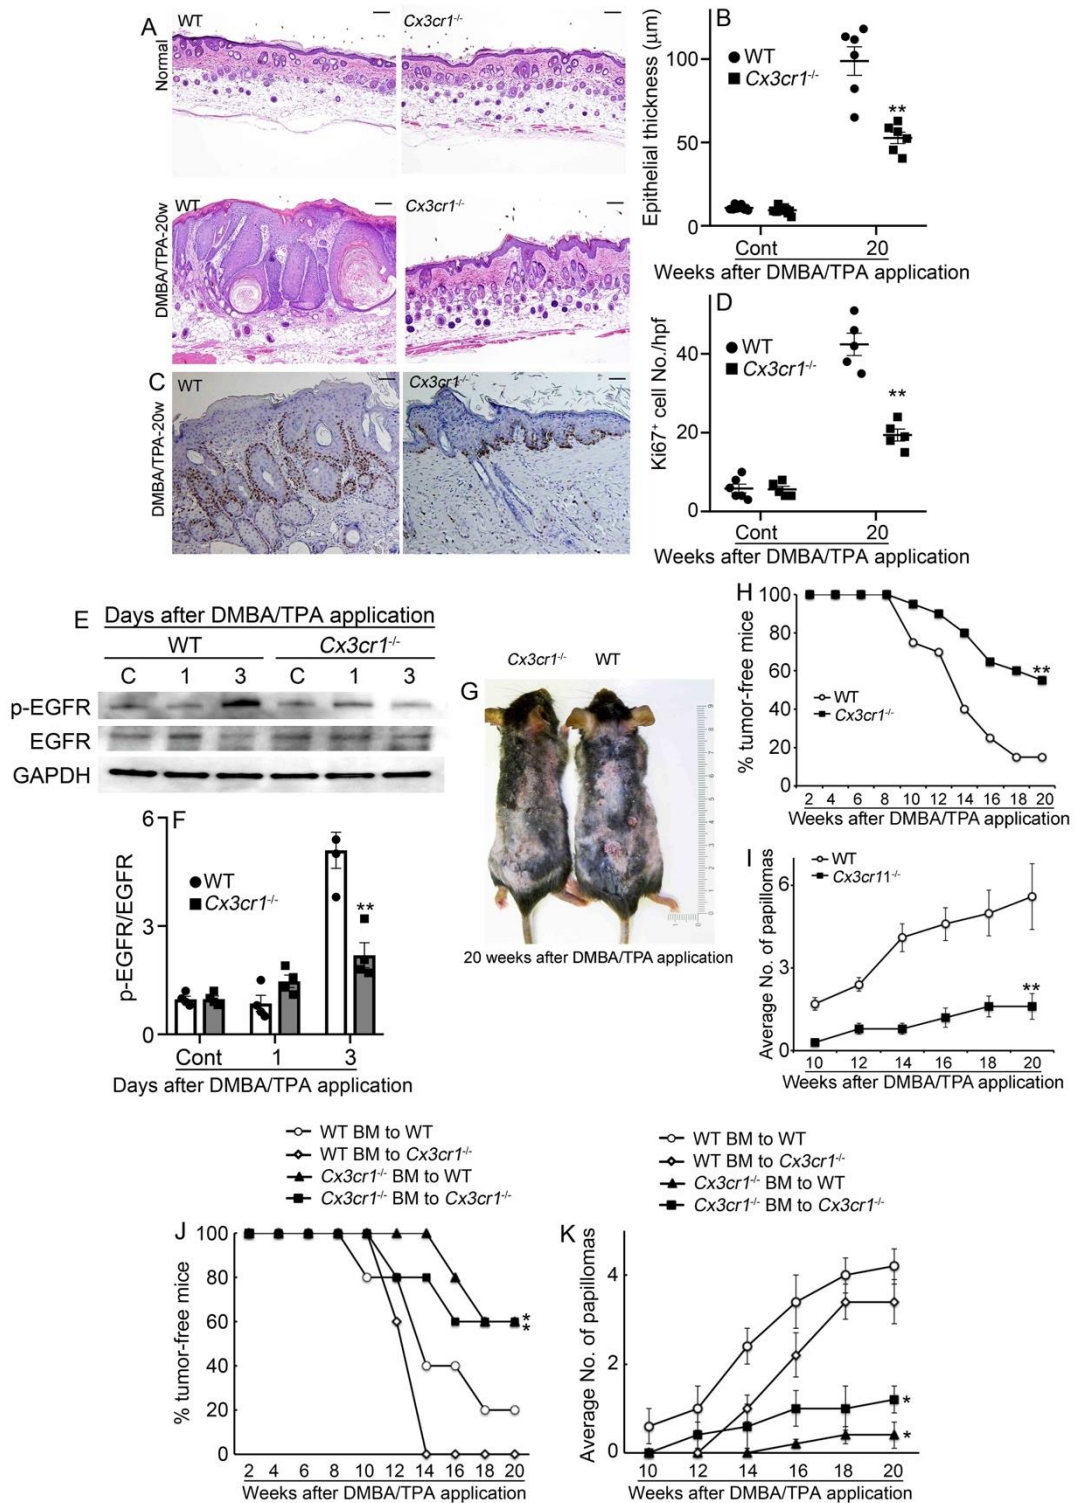

Figure 2



683 **Figure 2.** The evaluation of tumor incidence in WT and *Cx3cr1*<sup>-/-</sup> mice after  
684 DMBA/TPA treatment. (A) Evaluation of epidermal thickness in non-tumor skin lesion.  
685 Histological observations were conducted on the epidermal layers in WT and *Cx3cr1*<sup>-/-</sup>  
686 mice before or after DMBA/TPA treatment. Representative results from six animals are  
687 shown here. Scale bars, 100 μm (HE stain). (B) The average of the epidermal thickness  
688 was calculated. All values represent mean ± SEM (n=6). \*, *P* < 0.05, WT vs. *Cx3cr1*<sup>-/-</sup>  
689 mice, by unpaired Student's *t* test. (C) Evaluation of epidermal proliferation in  
690 non-tumor skin lesion. Ki67 was immunohistochemically detected. Representative  
691 results from six animals are shown here. Scale bars, 100 μm.  
692 (D) The number of Ki67<sup>+</sup> cells was counted. All values represent mean ± SEM (n=6). \*,  
693 *P* < 0.05, WT vs. *Cx3cr1*<sup>-/-</sup> mice, by unpaired Student's *t* test. (E and F) The effects of  
694 CX3CR1 on phosphorylation of EGFR in skin tissue after DMBA/TPA treatment. (E)  
695 Western blotting analysis using anti-GAPDH antibody confirmed that an equal amount  
696 of protein was loaded onto each lane. (F) The ratio of p-EGFR/EGFR was  
697 densitometrically determined and are shown. All values represent means ± SEM (4  
698 independent experiments). \*\**P* < 0.01 vs. WT mice. (G) Macroscopic pictures of skin  
699 papillomas in WT and *Cx3cr1*<sup>-/-</sup> mice. Representative results at 20 weeks after  
700 DMBA/TPA treatment are shown here. (H) The percentage of tumor-free mice at the  
701 indicated time points after DMBA/TPA treatment (n=20). \*\*, *P* < 0.01, WT vs. *Cx3cr1*<sup>-/-</sup>  
702 mice. (I) The average number of skin papillomas per mouse at the indicated time points  
703 after DMBA/TPA treatment (n=20). \*\*, *P* < 0.01, WT vs. *Cx3cr1*<sup>-/-</sup> mice. (J) The  
704 percentage of tumor-free mice at the indicated time points after DMBA/TPA treatment  
705 (n=5). \*, *P* < 0.05, vs. WT-BM to WT. (K) The average number of skin papillomas per  
706 mouse at the indicated time points after DMBA/TPA treatment (n=5). \*, *P* < 0.05, vs.  
707 WT-BM to WT, by unpaired Student's *t* test.

708

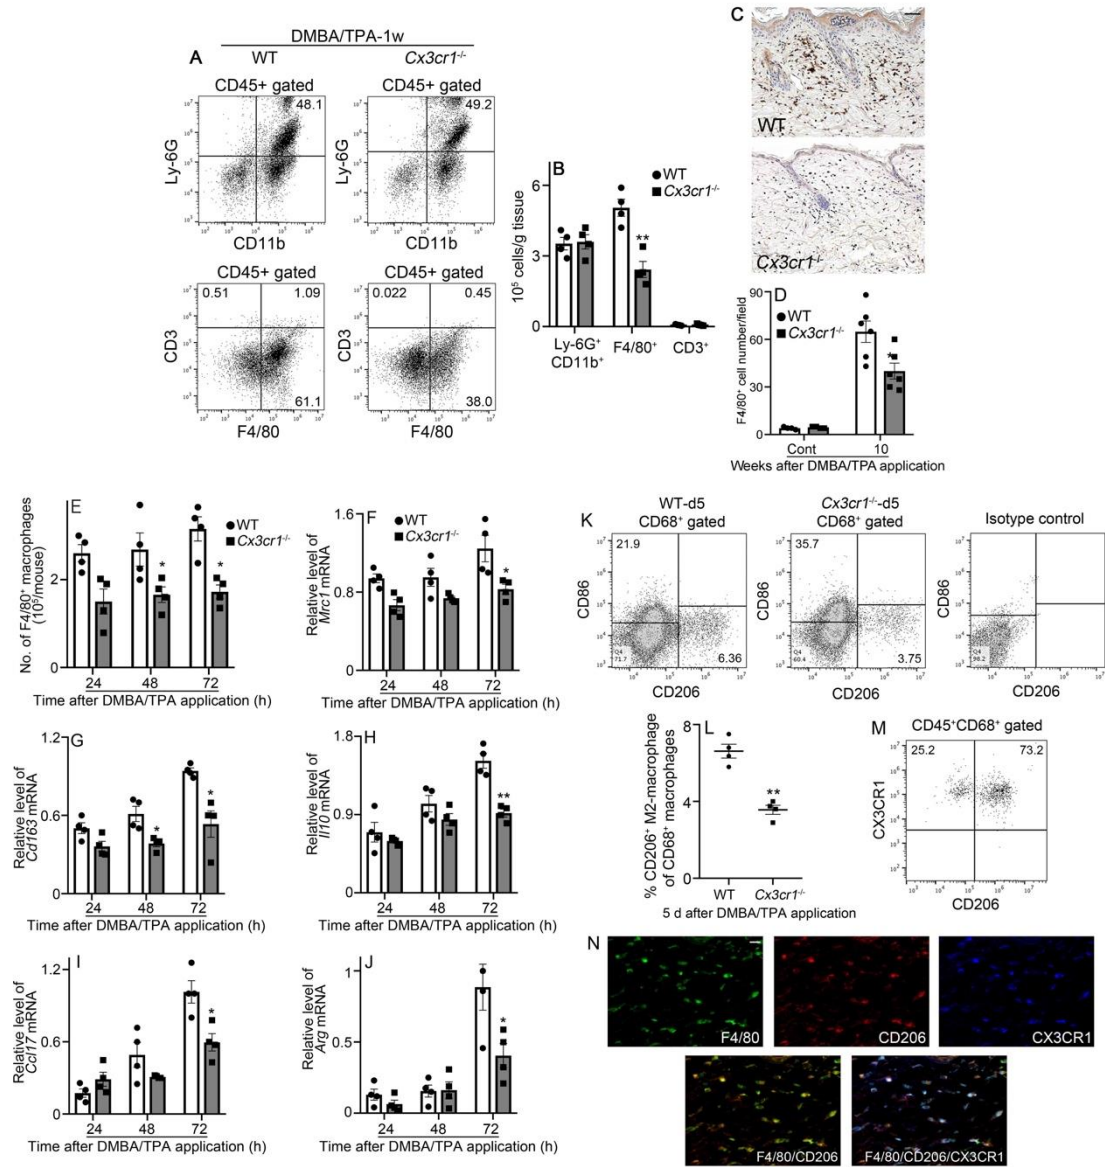

Figure 3

710 **Figure 3.** Evaluation of leukocyte recruitment in WT and *Cx3cr1*<sup>-/-</sup> mice after  
711 DMBA/TPA treatment. (A) Flow cytometric analysis on CD45<sup>+</sup> leukocytes in the skin  
712 tissue of WT and *Cx3cr1*<sup>-/-</sup> mice at 1 week after DMBA/TPA treatment. Representative  
713 results from 6 independent experiments are shown. (B) The number of Ly-6G<sup>+</sup>CD11b<sup>+</sup>  
714 neutrophils, F4/80<sup>+</sup> macrophages, and CD3<sup>+</sup> lymphocytes were calculated, and are  
715 shown. Each value represents mean ± SEM. \*\**P* < 0.05, vs. WT, by unpaired Student's *t*  
716 test. (C) Immunohistochemical analyses were conducted by using anti-F4/80 mAb.  
717 Representative results from six individual animals are shown. Scale bar, 50 μm. (D) The  
718 number of macrophages in the skin tissue at 10 weeks after DMBA/TPA treatment was  
719 determined. All values represent mean ± SEM (n=6). \*, *P* < 0.05, WT vs. *Cx3cr1*<sup>-/-</sup> mice,  
720 by unpaired Student's *t* test. (E-J) Suppressed gene expression of M2-macrophage  
721 markers in tissue macrophages obtained from *Cx3cr1*<sup>-/-</sup> mice compared to those of WT  
722 mice. (E) Cell number of F4/80<sup>+</sup> macrophages in skin tissues of WT and *Cx3cr1*<sup>-/-</sup> mice  
723 at 24, 48, and 72 h after DMBA/TPA treatment. F4/80<sup>+</sup> cells were extracted from skin  
724 single cell suspension by using MACS system, and calculated as cell number per mouse.  
725 Values represent mean ± SEM (n=4). \**P* < 0.05, vs. WT. (F-J) The expression of  
726 M2-macrophage marker, *Mrc1* (F), *Cd163* (G), *Il10* (H), *Ccl17* (I), and *Arg* (J) mRNA  
727 in the skin of WT mice after DMBA/TPA treatment. Values represent mean ± SEM  
728 (n=4). \*, *P* < 0.05; \*\*, *P* < 0.01, vs. WT, by 2-way ANOVA followed by Dunnett's  
729 post-hoc test. (K-N) Depressed M2-macrophage numbers of skin tumor sites of  
730 *Cx3cr1*<sup>-/-</sup> mice, compared with those of WT mice. (K) Flow cytometric analysis on  
731 CD86<sup>+</sup> M1-macrophages and CD206<sup>+</sup> M2-macrophages in the skin tissue of WT and  
732 *Cx3cr1*<sup>-/-</sup> mice at 5 days after DMBA/TPA treatment. Representative results from 6  
733 independent experiments are shown. (L) Percentage of CD206<sup>+</sup> M2-macrophage among  
734 CD68<sup>+</sup> macrophages (n=4). (M) Flow cytometric analysis on the portion of CD206<sup>+</sup>

735 M2-macrophages co-expressing CX3CR1. Representative results experiments are  
736 shown. (N) Triple-color immunofluorescence analyses were performed on  
737 DMBA/TPA-treated tissues (10 w). Representative results are shown here. Signals were  
738 merged digitally. Scale bar, 20  $\mu\text{m}$ .

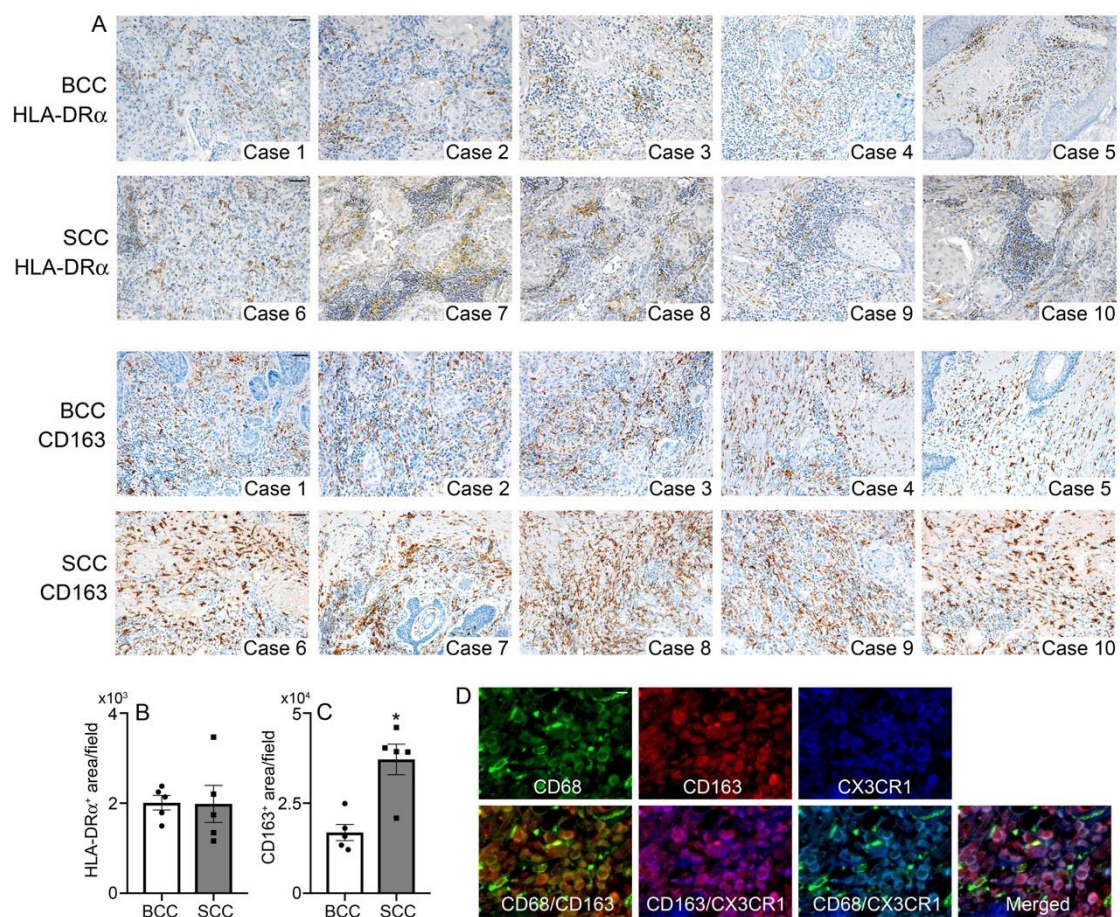

Figure 4

740 **Figure 4.** M1 and M2 macrophages in human skin cancer. (A) The expression of  
741 HLA-DR $\alpha$  (M1 macrophages marker) and CD163 (M2 macrophages marker) in the  
742 human BCC (Case 1-5) and SCC tissues (Case 6-10). Representative results are shown  
743 here. Scale bars, 50  $\mu$ m. (B and C) The occupied degrees of HLA-DR $\alpha$ <sup>+</sup> area (B) or  
744 CD163<sup>+</sup> area (C) per high power field in the skin tissue were determined. All values  
745 represent mean  $\pm$  SEM (n=5). \**P* < 0.05, BCC, by unpaired Student's *t* test. (D)  
746 CX3CR1-expressing M2 macrophages in human SCC tissues. Triple-color  
747 immunofluorescence analyses were performed on human SCC tissues. Representative  
748 results are shown here. Signals were merged digitally. Scale bar, 20  $\mu$ m.

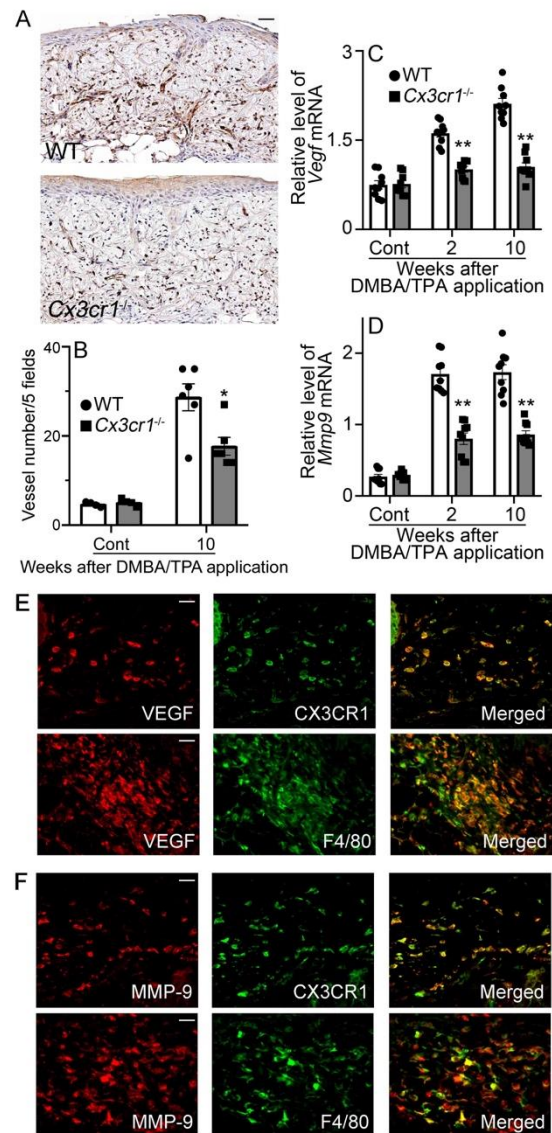

Figure 5



750 **Figure 5.** Evaluation of intradermal neovascularization in WT and *Cx3cr1*<sup>-/-</sup> mice after  
751 DMBA/TPA treatment. (A) Immunohistochemical analyses were conducted by using  
752 anti-CD31 mAb. Representative results from six individual animals are shown here.  
753 Scale bar, 50  $\mu$ m. (B) The numbers of vessels in the skin tissue were determined. All  
754 values represent mean  $\pm$  SEM (n=6). \*,  $P < 0.05$ , WT vs. *Cx3cr1*<sup>-/-</sup> mice, by unpaired  
755 Student's *t* test. (C) Intradermal gene expression of *Vegf* in WT and *Cx3cr1*<sup>-/-</sup> mice after  
756 DMBA/TPA treatment. Quantitative RT-PCR analyses were carried out. Values  
757 represent mean  $\pm$  SEM (n=6). (D) Intradermal gene expression of *Mmp9* in WT and  
758 *Cx3cr1*<sup>-/-</sup> mice after DMBA/TPA treatment. Values represent mean  $\pm$  SEM (n=6). (E)  
759 Cell types expressing VEGF in the skin of DMBA/TPA-treated WT mice. (F) Cell types  
760 expressing MMP-9 in the skin of DMBA/TPA-treated WT mice. Double-color  
761 immunofluorescence analyses were performed. Representative results from six  
762 individual animals are shown here. Signals were merged digitally. Scale bars, 20  $\mu$ m.

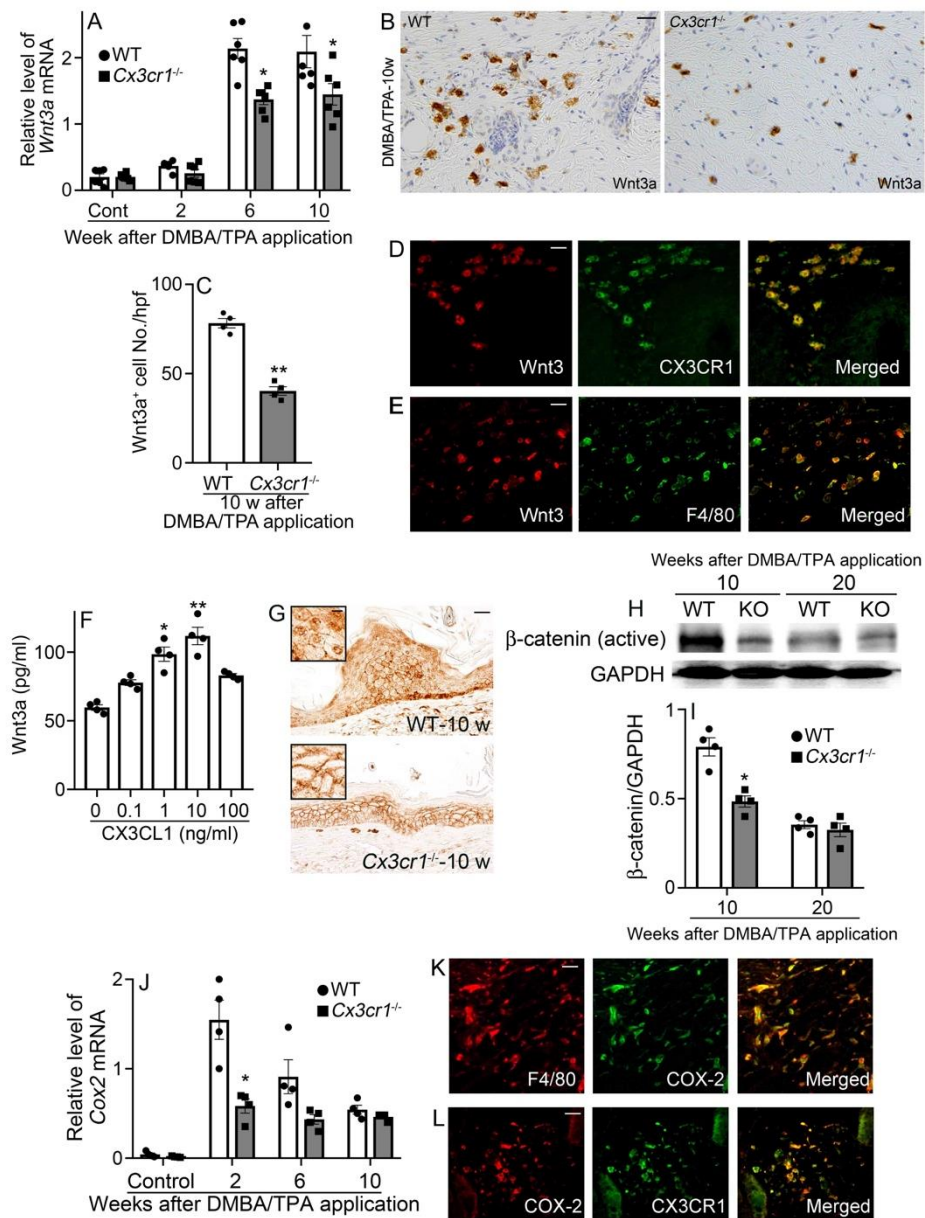

Figure 6

764 **Figure 6.** Evaluation of intradermal Wnt3a expression in WT and *Cx3cr1*<sup>-/-</sup> mice after  
765 DMBA/TPA treatment. (A) Intradermal mRNA expression of *Wnt3a* in WT and  
766 *Cx3cr1*<sup>-/-</sup> mice after DMBA/TPA treatment. Values represent mean ± SEM (n=6). \*, *P* <  
767 0.05, WT vs. *Cx3cr1*<sup>-/-</sup> mice, by 2-way ANOVA followed by Dunnett's post-hoc test. (B)  
768 Immunohistochemical analyses were conducted by using anti-Wnt3a antibodies.  
769 Representative results from six individual animals are shown here. Scale bar, 20 μm.  
770 (C) The number of Wnt3a<sup>+</sup> cells in the skin tissue were determined. All values represent  
771 mean ± SEM (n=6). \*, *P* < 0.05, WT vs. *Cx3cr1*<sup>-/-</sup> mice, by unpaired Student's *t* test. (D  
772 and E) Cell type expressing Wnt3 in the skin of DMBA/TPA-treated WT mice.  
773 Representative results from six individual animals are shown here. Signals were merged  
774 digitally. Scale bars, 20 μm. (F) RAW263.7 were stimulated with CX3CL1 for 2 h to be  
775 subjected to ELISA for Wnt3a. All values represent the mean ± SEM (n=4 independent  
776 experiments). \*\**P* < 0.01, \**P* < 0.05, vs. no stimulation, by one-way ANOVA followed by  
777 Dunnett's post hoc test. (G) Skin samples were immunostained with anti-β-catenin  
778 antibodies and representative result from 4 independent animals were shown. Insets are  
779 higher magnifications of the positively stained cells. Scale bar, 20 μm; scale bar in  
780 inserts, 5 μm. (H) The expression of β-catenin (active) and GAPDH were analyzed by  
781 Western blot analysis. Representative image from 4 independent experiments are shown.  
782 (I) β-catenin (active) protein were determined based on the band intensities. All values  
783 represent the mean ± SEM. \**P* < 0.05, vs. WT, by unpaired Student's *t* test. (J)  
784 Intradermal gene expression of *Cox2* in WT and *Cx3cr1*<sup>-/-</sup> mice after DMBA/TPA  
785 treatment. Value represent mean ± SEM (n=4). \**P* < 0.05, vs. WT, by 2-way ANOVA  
786 followed by Dunnett's post-hoc test. (K and L) Cell types expressing COX-2 in the skin  
787 of DMBA/TPA-treated WT mice. Representative results from six individual animals are  
788 shown here. Signals were merged digitally. Scale bars, 20 μm.

789 **Supplemental Material**

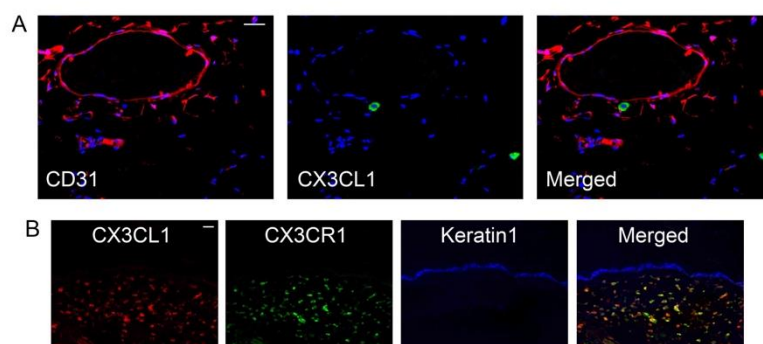

Supplemental figure 1

791 **Supplemental Figure 1.** Cell types expressing CX3CL1 and CX3CR1 in the skin of  
792 DMBA/TPA-treated WT mice. (A) CD31<sup>+</sup> endothelial cells did not express CX3CL1 in  
793 the skin. Scale bar, 20  $\mu$ m. (B) Almost CX3CL1-expressing monocytes were also  
794 express CX3CR1 in the skin. Representative results from six individual animals are  
795 shown. Signals were merged digitally. Scale bar, 20  $\mu$ m.

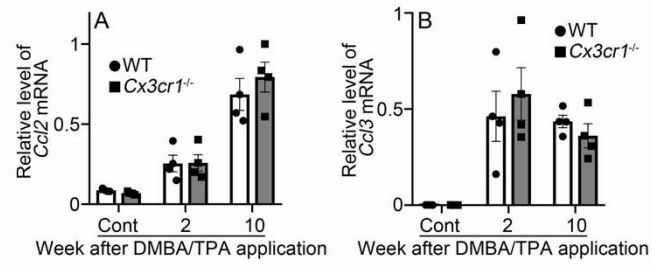

Supplemental figure 2

797 **Supplemental Figure 2.** Intradermal mRNA expression of *Ccl2* (A) and *Ccl3* (B) in  
798 WT and *Cx3cr1*<sup>-/-</sup> mice after DMBA/TPA treatment. Quantitative RT-PCR analyses  
799 were carried out. Values represent mean ± SEM (n=4).

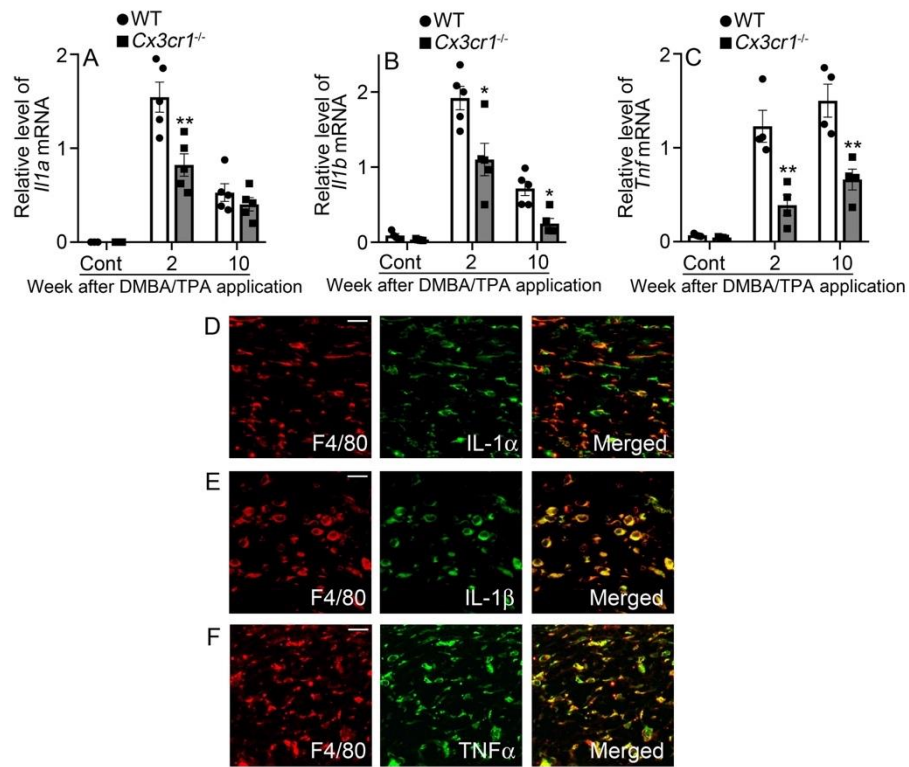

Supplemental figure 3



801 **Supplemental Figure 3.** Evaluation of intradermal expression of *Il1a*, *Il1b* and *Tnf* in  
802 WT and *Cx3cr1*<sup>-/-</sup> mice. (A-C) Intradermal gene expression of *Il1a* (A), *Ilb* (B) and *Tnf*  
803 (C) in WT and *Cx3cr1*<sup>-/-</sup> mice after DMBA/TPA treatment. Values represent mean ±  
804 SEM (n=4). \**P* < 0.05, \*\**P* < 0.01, WT vs. *Cx3cr1*<sup>-/-</sup> mice, by 2-way ANOVA followed  
805 by Dunnett's post-hoc test. (D-F) Cell types expressing IL-1α (D), IL-1β (E) and TNF-α  
806 (F) in the skin of DMBA/TPA-treated WT mice. Representative results from six  
807 individual animals are shown here. Signals were merged digitally. Scale bar, 20 μm.

808

809 **Supplemental Table 1.** Profile of each patient with skin cancer

810

811 **Supplemental Table 2.** Sequences of primers used for real-time RT-PCR

812 **Supplemental Table 1.** Profile of each patient with skin cancer

| Case No. | Type | Age | Sex | Site   |
|----------|------|-----|-----|--------|
| 1        | BCC  | 86  | M   | Face   |
| 2        | BCC  | 75  | F   | Face   |
| 3        | BCC  | 60  | F   | Face   |
| 4        | BCC  | 39  | F   | Head   |
| 5        | BCC  | 59  | M   | Face   |
| 6        | SCC  | 96  | F   | Face   |
| 7        | SCC  | 68  | M   | Hand   |
| 8        | SCC  | 90  | M   | Finger |
| 9        | SCC  | 90  | M   | Face   |
| 10       | SCC  | 86  | M   | Face   |

813 BCC: Basal cell carcinoma, SCC: Squamous cell carcinoma

814 **Supplemental Table 2.** Sequences of primers used for real-time RT-PCR

| Transcript    | Sequence                            |
|---------------|-------------------------------------|
| <i>Cx3cr1</i> | (F) 5'-CCGGTCTCATTGCGAGGCTTA-3'     |
|               | (R) 5'-TGGGAATTGAACTTGGGACCTC-3'    |
| <i>Cx3cl1</i> | (F) 5'-ACCTATGGCCCTGACATCATCAC-3'   |
|               | (R) 5'-CTTGCCAGCCCTCAGAATCAC-3'     |
| <i>Ccl2</i>   | (F) 5'-GCATCCACGTGTTGGCTCA-3'       |
|               | (R) 5'-CTCCAGCCTACTCATTGGGATCA-3'   |
| <i>Ccl3</i>   | (F) 5'-CATGACACTCTGCAACCAAGTCTTC-3' |
|               | (R) 5'-GAGCAAAGGCTGCTGGTTTCA-3'     |
| <i>Vegf</i>   | (F) 5'-TCCAACATCACCATGCAGAT-3'      |
|               | (R) 5'-CATCTGCAAGTACGTTCGTT-3'      |
| <i>Mmp9</i>   | (F) 5'-GCCCTGGAACCTCACACGACA-3'     |
|               | (R) 5'-TTGGAAACTCACACGCCAGAAG-3'    |
| <i>Mrc</i>    | (F) 5'-AGCTTCATCTTCGGGCCTTTG-3'     |
|               | (R) 5'-GGTGACCACTCCTGCTGCTTTAG-3'   |
| <i>Cd163</i>  | (F) 5'-ACTTCAGAATCACATCATGGCACA-3'  |
|               | (R) 5'-TCGTGCTTCAGAGTCCACAG-3'      |
| <i>Il10</i>   | (F) 5'-GCCAGAGCCACATGCTCCTA-3'      |
|               | (R) 5'-GATAAGGCTTGGCAACCCAAGTAA-3'  |
| <i>Ccl17</i>  | (F) 5'-TCAGTGGAGTGTTCCAGGGATG-3'    |
|               | (R) 5'-GGCGTCTCCAAATGCCTCA-3'       |
| <i>Arg</i>    | (F) 5'-AGCTCTGGGAATCTGCATGG-3'      |
|               | (R) 5'-ATGTACACGATGTCTTTGGCAGATA-3' |
| <i>Wnt3a</i>  | (F) 5'-CCATGAACCGTCACAACAATGAG-3'   |
|               | (R) 5'-CCGTGGCATTGCACTTGAG-3'       |
| <i>Cox2</i>   | (F) 5'-GCCAGGCTGAACTTCGAAACA-3'     |
|               | (R) 5'-GTCCACGAGGCCACTGATACCTA-3'   |
| <i>Il1a</i>   | (F) 5'-TGGTTAAATGACCTGCAACAGGAA-3'  |
|               | (R) 5'-AGGTCGGTCTCACTACCTGTGATG-3'  |
| <i>Il1b</i>   | (F) 5'-TCCAGGATGAGGACATGAGCAC-3'    |
|               | (R) 5'-GAACGTCACACACCAGCAGGTTA-3'   |
| <i>Tnf</i>    | (F) 5'-AAGCCTGTAGCCCACGTCGTA-3'     |
|               | (R) 5'-GGCACCCTAGTTGGTTGTCTTTG-3'   |
| <i>Actb</i>   | (F) 5'-CATCCGTAAGACCTCTATGCCAAC-3'  |
|               | (R) 5'-ATGGAGCCACCGATCCACA-3'       |

815 (F), Forward primer; (R), Reverse primer
